# Supplementary material
Source: PubMed Central journal article supplement (PMC5214896)

Supplemental Table 1 – Iterative modeling results for appointment and medication non-adherence and the outcome of graft loss

| Model Iterations                                                          | No Show Rate $\geq 12\%$ |           |         |       | Medication Possession Ratio $< 80\%$ |           |         |       |
|---------------------------------------------------------------------------|--------------------------|-----------|---------|-------|--------------------------------------|-----------|---------|-------|
|                                                                           | HR                       | 95% CI    | p-value | AIC   | HR                                   | 95% CI    | p-value | AIC   |
| Unadjusted                                                                | 1.714                    | 1.47-2.00 | <0.001  | 15726 | 2.64                                 | 2.32-3.00 | <0.001  | 15546 |
| Adjusted for Baseline Covariates*                                         | 2.037                    | 1.72-2.41 | <0.001  | 15567 | 2.634                                | 2.31-3.00 | <0.001  | 15414 |
| Adjusted for Baseline & Outcomes <sup>*,†</sup>                           | 1.965                    | 1.65-2.34 | <0.001  | 15534 | 2.631                                | 2.30-3.01 | <0.001  | 15375 |
| Adjusted for Baseline, Outcomes and Adherence Covariates <sup>*,†,^</sup> | 1.650                    | 1.38-1.97 | <0.001  | 15344 | 2.508                                | 1.38-1.97 | <0.001  | 15344 |

<sup>†</sup>Includes age, gender, race, marital status, comorbidities, donor characteristics, immunologic risks and baseline immunosuppression

<sup>†</sup>Includes rejection and delayed graft function

<sup>^</sup>Includes medication and appointment non-adherence in models

Supplemental Table 2 – Iterative modeling outcomes, mirroring Table 3, for the dataset that included missing data estimates using multiple imputation (N=4,646)

| Model Iterations                                           | No Show Rate $\geq 12\%$ |           |           | Medication Possession Ratio $< 80\%$ |           |           |
|------------------------------------------------------------|--------------------------|-----------|-----------|--------------------------------------|-----------|-----------|
|                                                            | HR                       | 95% CI    | p-value   | HR                                   | 95% CI    | p-value   |
| Unadjusted                                                 | 1.772                    | 1.55-2.03 | $< 0.001$ | 2.511                                | 2.23-2.82 | $< 0.001$ |
| Adjusted for Baseline Covariates*                          | 2.052                    | 1.77-2.38 | $< 0.001$ | 2.485                                | 2.21-2.80 | $< 0.001$ |
| Adjusted for Baseline & Outcomes*,+                        | 1.997                    | 1.72-2.32 | $< 0.001$ | 2.483                                | 2.21-2.80 | $< 0.001$ |
| Adjusted for Baseline, Outcomes & Adherence Covariates*,+^ | 1.734                    | 1.49-2.02 | $< 0.001$ | 2.365                                | 2.10-2.66 | $< 0.001$ |

\*Includes age, gender, race, marital status, comorbidities, donor criteria, immunologic risks and baseline immunosuppression

+Include rejection and delayed graft function

^Include both medication and appointment non-adherence in models

Supplemental Figure 1 – Consort diagram describing how the study population and cohorts were developed

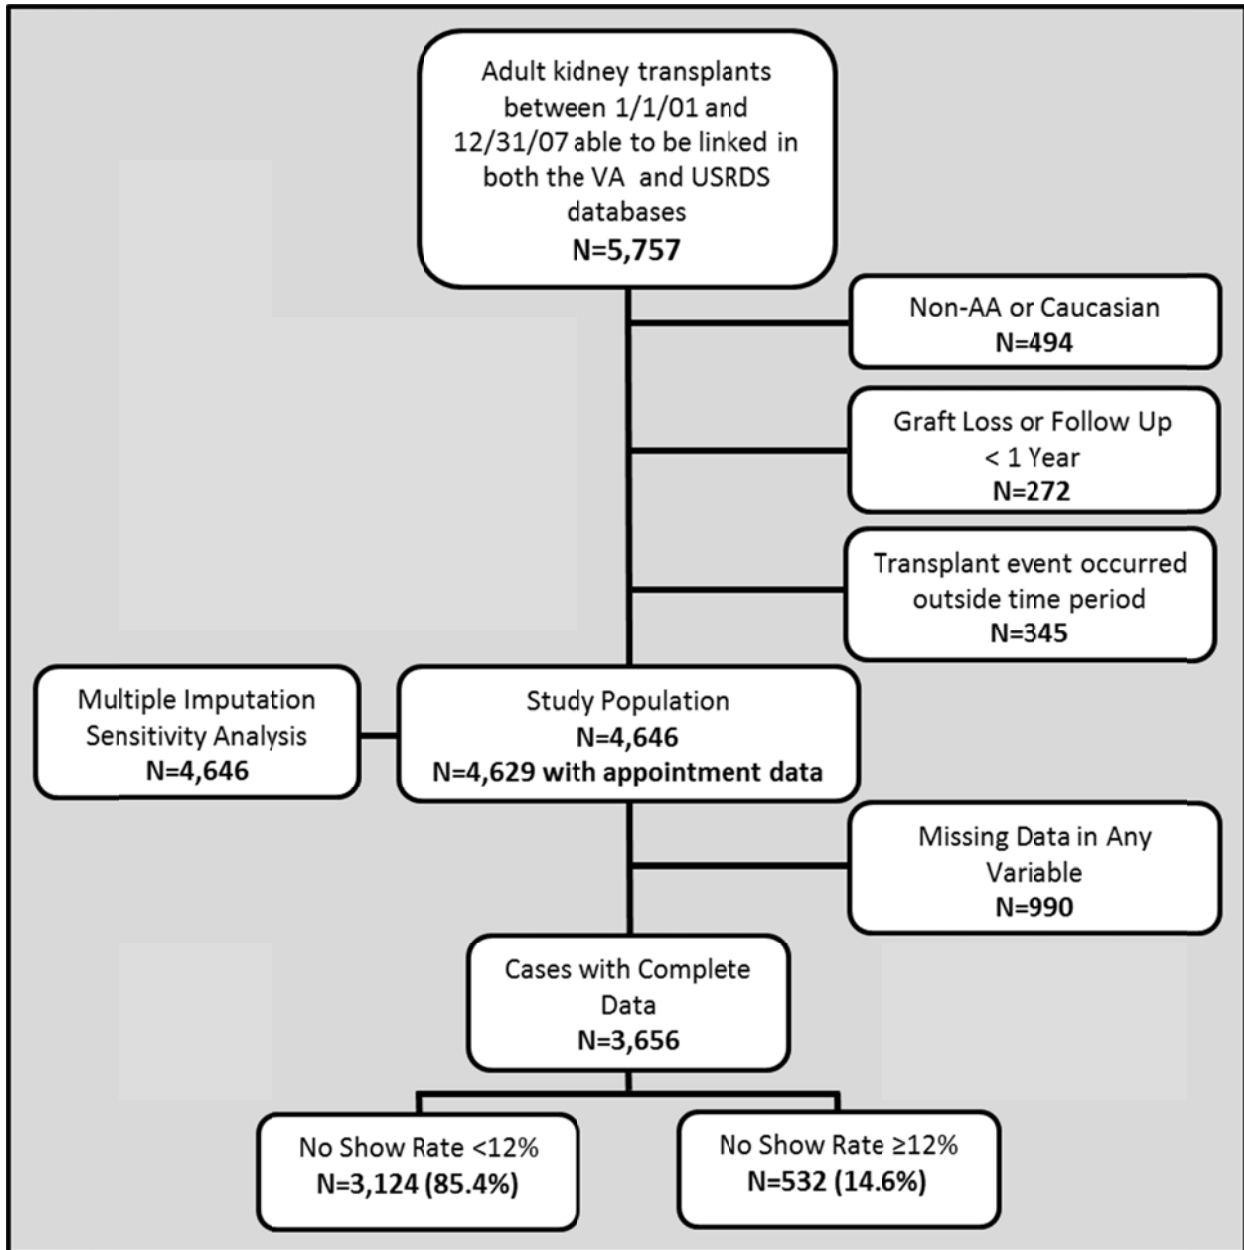

Supplemental Figure 2 – Histogram displaying the frequency distribution of the aggregated median appointment non-adherence for each patient during the follow up period

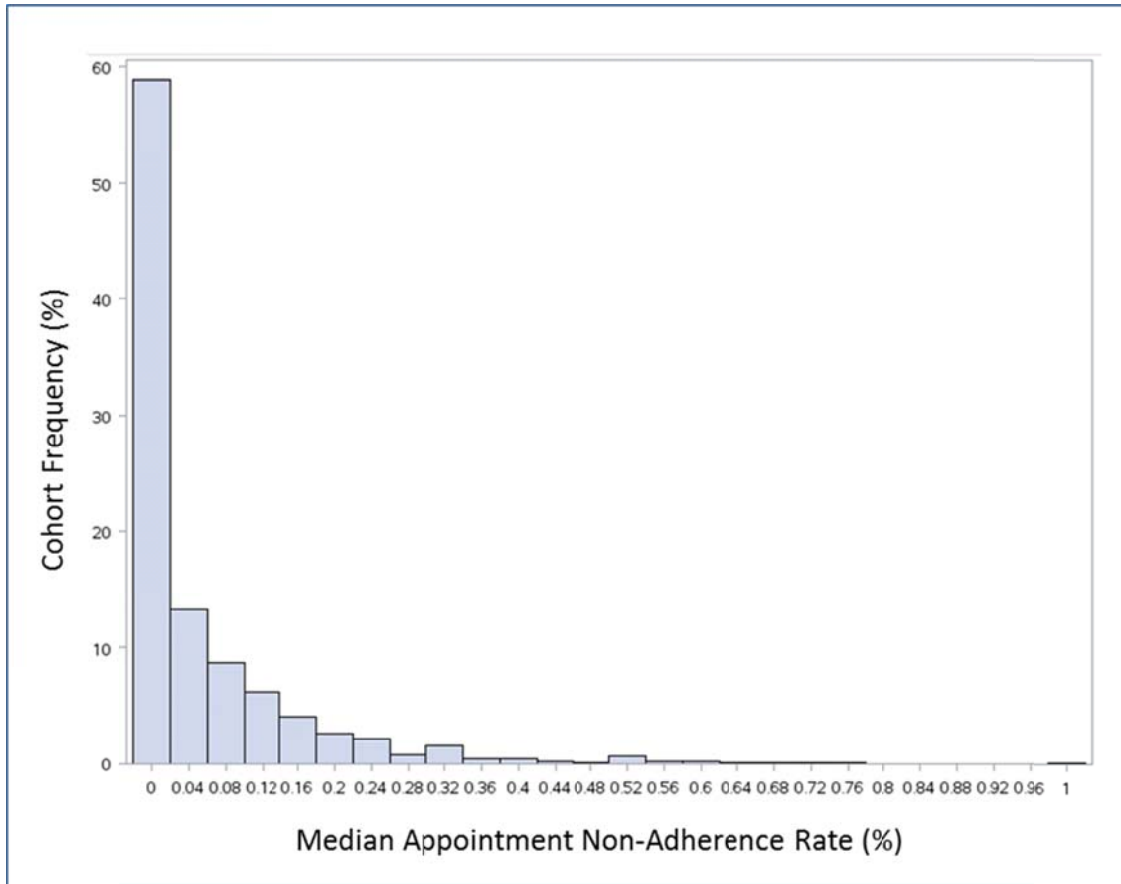

Supplemental Figure 3 – Dose-response curve comparing median appointment non-adherence rates to adjusted risk of graft loss

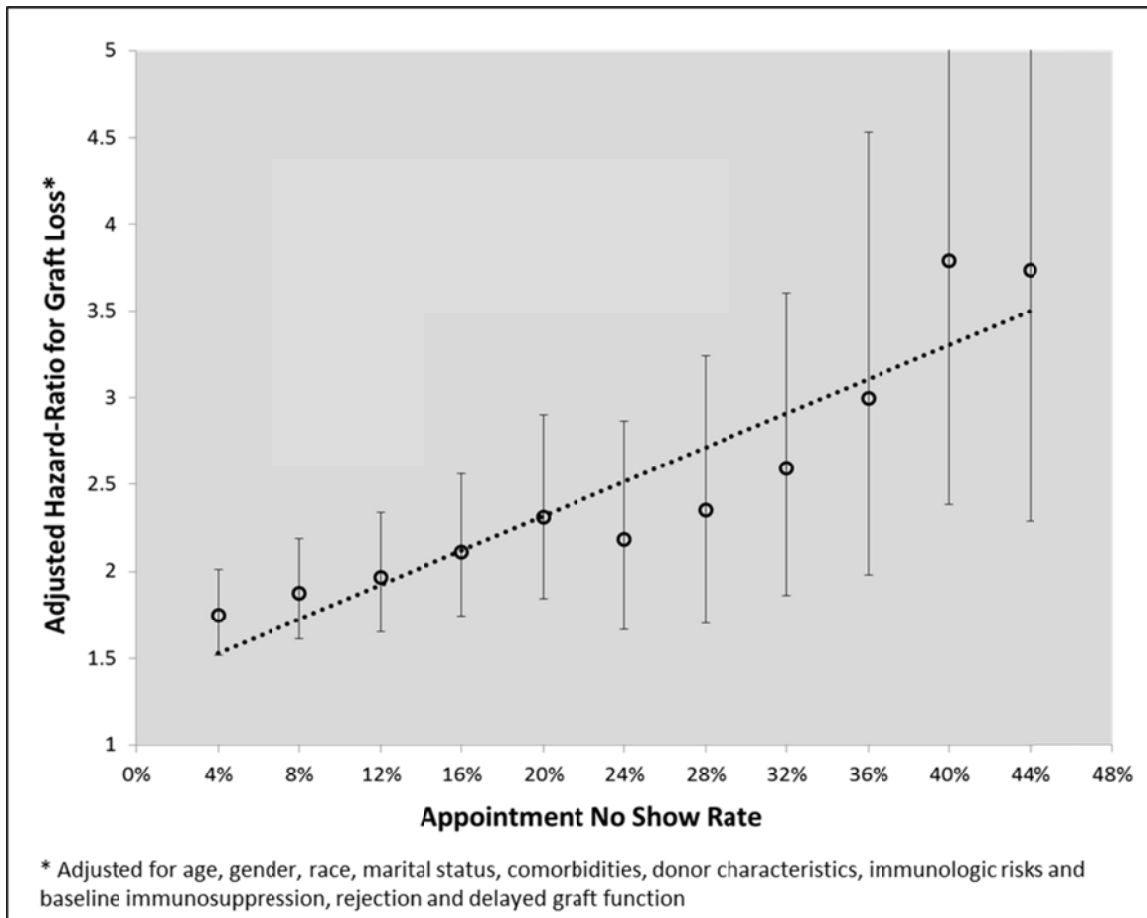

Supplemental Figure 4 – Correlation between appointment non-adherence and medication non-adherence by comparing median rates based on ventiles

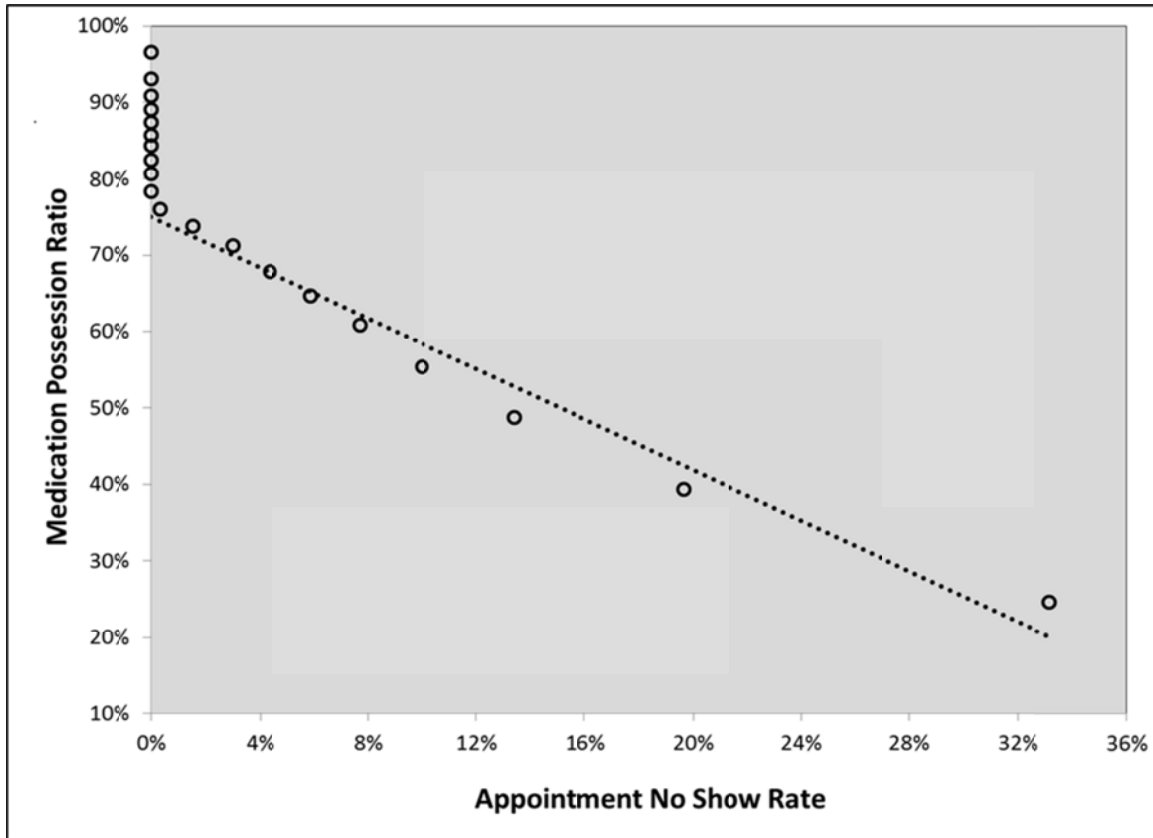

Supplement: NIHMS832292-supplement-supplement_1.pdf [file NIHMS832292-supplement-supplement_1.pdf]
